# Supplementary material
Source: ML conference proceedings conference paper supplement (https://proceedings.neurips.cc/paper_files/paper/2022/hash/94f625dcdec313cd432d65f96fcc51c8-Abstract.html)
Supplement: Supplementary file 1 [file 94f625dcdec313cd432d65f96fcc51c8-Supplemental-Conference.pdf]

## A Omitted Proofs

We first state two technical lemmas that have been extensively used in the analysis of adaptive methods, the proofs of which can be found in [31].

**Lemma 6.** *Let a sequence of non-negative real numbers  $\alpha_1, \dots, \alpha_T \geq 0$  then*

$$\sqrt{\sum_{t=1}^T \alpha_t} \leq \sum_{t=1}^T \frac{\alpha_t}{\sqrt{\sum_{s=1}^t \alpha_s}}$$

**Lemma 7.** *Let a sequence of non-negative real numbers  $\alpha_1, \dots, \alpha_T \geq 0$  then*

$$\sum_{t=1}^T \frac{\alpha_t}{1 + \sum_{s=1}^t \alpha_s} \leq \log \left( 1 + \sum_{t=1}^T \alpha_t \right)$$

**Lemma 1.** *Define the gradient estimator at point  $x$  as  $\nabla_x := \nabla f_i(x) - \nabla f_i(y) + \nabla_y$  where  $i$  is sampled uniformly at random from  $\{1, \dots, n\}$ . Then,*

$$\mathbb{E} [\|\nabla_x - \nabla f(x)\|^2] \leq L^2 \|x - y\|^2 + \mathbb{E} [\|\nabla_y - \nabla f(y)\|^2]$$

*Proof.*

$$\begin{aligned} \mathbb{E} [\|\nabla_x - \nabla f(x)\|^2] &= \mathbb{E} [\|\nabla f_i(x) - \nabla f_i(y) + \nabla_y - \nabla f(x)\|^2] \\ &= \mathbb{E} [\|\nabla f_i(x) - \nabla f_i(y) + \nabla_y - \nabla f(x) + \nabla f(y) - \nabla f(y)\|^2] \\ &= \mathbb{E} [\|\nabla f_i(x) - \nabla f_i(y) - \nabla f(x) + \nabla f(y)\|^2] \\ &\quad + 2 \cdot \mathbb{E} [\langle \nabla f_i(x) - \nabla f_i(y) - \nabla f(x) + \nabla f(y), \nabla_y - \nabla f(y) \rangle] \\ &\quad + \mathbb{E} [\|\nabla_y - \nabla f(y)\|^2] \end{aligned}$$

Notice that  $\mathbb{E} [\nabla f_i(x) - \nabla f_i(y) - \nabla f(x) + \nabla f(y)] = 0$  due to the fact that  $i$  is selected uniformly at random in  $\{1, \dots, n\}$  and thus  $\mathbb{E} [\nabla f_i(x) - \nabla f_i(y)] = \nabla f(x) - \nabla f(y)$ . The latter implies that,

$$\begin{aligned} \mathbb{E} [\|\nabla_x - \nabla f(x)\|^2] &= \mathbb{E} [\|\nabla f_i(x) - \nabla f_i(y) - \nabla f(x) + \nabla f(y)\|^2] + \mathbb{E} [\|\nabla_y - \nabla f(y)\|^2] \\ &\leq \mathbb{E} [\|\nabla f_i(x) - \nabla f_i(y)\|^2] + \mathbb{E} [\|\nabla_y - \nabla f(y)\|^2] \\ &\leq L^2 \cdot \mathbb{E} [\|x - y\|^2] + \mathbb{E} [\|\nabla_y - \nabla f(y)\|^2] \end{aligned}$$

where the first inequality follows by the identity  $\mathbb{E} [\|X - \mathbb{E}[X]\|^2] = \mathbb{E}[\|X\|^2] - \|\mathbb{E}[X]\|^2$  and the second inequality by the smoothness of the function  $f_i(x)$ . ■

**Lemma 2.** *Let  $x_0, x_1, \dots, x_T$  the points produced by Algorithm 1. Then,*

$$\sum_{t=0}^{T-1} \|\nabla_t\|^2 \leq \mathcal{O} \left( n^2 T^3 \cdot \left( \frac{L^2}{\beta_0^2} + \|\nabla f(x_0)\|^2 \right) \right)$$

*Proof.* The selection of the step-size in Step 9 of Algorithm 1 implies that  $\|x_{t+1} - x_t\|^2 = \|\gamma_t \nabla_t\|^2 \leq 1/\beta_0^2$ . Due to the fact that every  $n$  iterations a full-gradient computation is performed, the estimator  $\nabla_t := \nabla f_{i_t}(x_t) - \nabla f_{i_t}(x_{t-1}) + \nabla_{t-1}$  can be equivalently written as

$$\nabla_t = \sum_{s=t-t \bmod n+1}^t (\nabla f_{i_s}(x_s) - \nabla f_{i_s}(x_{s-1})) + \nabla f(x_{t-t \bmod n})$$

As a result,

$$\begin{aligned}
\|\nabla_t\|^2 &= \left\| \sum_{s=t-t \bmod n+1}^t (\nabla f_{i_s}(x_s) - \nabla f_{i_s}(x_{s-1})) + \nabla f(x_{t-t \bmod n}) \right\|^2 \\
&\leq 2 \cdot \left\| \sum_{s=t-t \bmod n+1}^t \nabla f_{i_s}(x_s) - \nabla f_{i_s}(x_{s-1}) \right\|^2 + 2 \cdot \|\nabla f(x_{t-t \bmod n})\|^2 \\
&\leq 2n \cdot \sum_{s=t-t \bmod n+1}^t \|\nabla f_{i_s}(x_s) - \nabla f_{i_s}(x_{s-1})\|^2 + 2 \cdot \|\nabla f(x_{t-t \bmod n})\|^2 \\
&\leq 2nL^2 \cdot \sum_{s=t-t \bmod n+1}^t \|x_s - x_{s-1}\|^2 + 2 \cdot \|\nabla f(x_{t-t \bmod n})\|^2 \\
&\leq \frac{2L^2n^2}{\beta_0^2} + 2 \cdot \|\nabla f(x_{t-t \bmod n})\|^2
\end{aligned}$$

Now, we want to upper bound  $\|\nabla f(x_t)\|$  for any  $t \leq T$  with respect to the initial gradient norm. Using again the step-size selection  $\gamma_t$  we get,

$$\begin{aligned}
\|\nabla f(x_t)\| &= \|\nabla f(x_t) - \nabla f(x_0) + \nabla f(x_0)\| \\
&\leq \|\nabla f(x_t) - \nabla f(x_0)\| + \|\nabla f(x_0)\| && \text{(Triangular inequality)} \\
&\leq L\|x_t - x_0\| + \|\nabla f(x_0)\| && \text{(Smoothness)} \\
&\leq L\|x_t - x_{t-1}\| + L\|x_{t-1} - x_0\| + \|\nabla f(x_0)\| && \text{(Triangular inequality)} \\
&\leq L \sum_{i=1}^t \|x_i - x_{i-1}\| + \|\nabla f(x_0)\| \\
&\leq \frac{Lt}{\beta_0} + \|\nabla f(x_0)\|
\end{aligned}$$

As a result,

$$\begin{aligned}
\sum_{t=0}^{T-1} \|\nabla_t\|^2 &\leq \sum_{t=0}^{T-1} \left( \frac{2L^2n^2}{\beta_0^2} + 2 \cdot \|\nabla f(x_{t-t \bmod n})\|^2 \right) \\
&\leq \frac{2L^2n^2}{\beta_0^2} T + 2 \sum_{t=0}^{T-1} \|\nabla f(x_t)\|^2 \\
&\leq \frac{2L^2n^2}{\beta_0^2} T + 2 \sum_{t=0}^{T-1} \left( \frac{Lt}{\beta_0} + \|\nabla f(x_0)\| \right)^2 \\
&= \frac{2L^2n^2}{\beta_0^2} T + 2 \sum_{t=0}^{T-1} \left( \frac{L^2t^2}{\beta_0^2} + 2\frac{Lt}{\beta_0} \|\nabla f(x_0)\| + \|\nabla f(x_0)\|^2 \right) \\
&\leq \frac{2L^2n^2}{\beta_0^2} T + \frac{2L^2T^3}{\beta_0^2} + \frac{4LT^2\|\nabla f(x_0)\|}{\beta_0} + 2T\|\nabla f(x_0)\|^2
\end{aligned}$$

■

**Lemma 3.** Let  $x_0, x_1, \dots, x_T$  the sequence of points produced by Algorithm 1. Then,

$$\sum_{t=0}^{T-1} \mathbb{E} [\|\nabla_t - \nabla f(x_t)\|^2] \leq \mathcal{O} \left( \frac{Ln^{1/4}}{\beta_0} \sqrt{\log \left( 1 + nT \cdot \left( \frac{L}{\beta_0 G_0} + \frac{\|\nabla f(x_0)\|}{G_0} \right) \right)} \right).$$

*Proof.*

$$\begin{aligned}
\mathbb{E} \left[ \sum_{t=0}^{T-1} \|\nabla_t - \nabla f(x_t)\| \right] &= \mathbb{E} \left[ \sqrt{\left( \sum_{t=0}^{T-1} \|\nabla_t - \nabla f(x_t)\| \right)^2} \right] \\
&\leq \sqrt{\mathbb{E} \left[ \left( \sum_{t=0}^{T-1} \|\nabla_t - \nabla f(x_t)\| \right)^2 \right]} \quad (\text{Jensen's ineq.}) \\
&\leq \sqrt{T} \cdot \sqrt{\mathbb{E} \left[ \sum_{t=0}^{T-1} \|\nabla_t - \nabla f(x_t)\|^2 \right]}
\end{aligned}$$

where the last inequality follows by the fact that  $\|\sum_{t=0}^{T-1} y_t\|^2 \leq T \cdot \sum_{t=0}^{T-1} \|y_t\|^2$ . By applying Lemma 1 to the estimator  $\nabla_t := \nabla f_{i_t}(x_t) - \nabla f_{i_t}(x_{t-1}) + \nabla_{t-1}$  we get,

$$\begin{aligned}
\mathbb{E} [\|\nabla_t - \nabla f(x_t)\|^2] &\leq L^2 \mathbb{E} [\|x_t - x_{t-1}\|^2] + \mathbb{E} [\|\nabla_{t-1} - \nabla f(x_{t-1})\|^2] \\
&\leq L^2 \mathbb{E} [\gamma_{t-1}^2 \|\nabla_{t-1}\|^2] + \mathbb{E} [\|\nabla_{t-1} - \nabla f(x_{t-1})\|^2] \\
&\leq L^2 \mathbb{E} [\gamma_{t-1}^2 \|\nabla_{t-1}\|^2] + \dots + \mathbb{E} [\|\nabla_{t-(t \bmod n)} - \nabla f(x_{t-(t \bmod n)})\|^2] \\
&= \sum_{\tau=t-(t \bmod n)+1}^{t-1} L^2 \mathbb{E} [\gamma_\tau^2 \cdot \|\nabla_\tau\|^2]
\end{aligned}$$

where the last equality follows by the fact that  $\mathbb{E} [\|\nabla_{t-(t \bmod n)} - \nabla f(x_{t-(t \bmod n)})\|^2] = 0$  (see Step 3 of Algorithm 1). As explained in Section 3, by a telescoping summation over  $t$  we get that

$$\sum_{t=0}^{T-1} \mathbb{E} [\|\nabla_t - \nabla f(x_t)\|^2] \leq L^2 n \cdot \mathbb{E} \left[ \sum_{t=0}^{T-1} \gamma_t^2 \cdot \|\nabla_t\|^2 \right].$$

Now as discussed in Section 3, using the step-size selection  $\gamma_t$  of Algorithm 1 we can provide a bound on the total variance  $\mathbb{E} [\|\nabla_t - \nabla f(x_t)\|^2]$

$$\begin{aligned}
\sum_{t=0}^{T-1} \mathbb{E} [\|\nabla_t - \nabla f(x_t)\|^2] &\leq L^2 n \mathbb{E} \left[ \sum_{t=0}^{T-1} \gamma_t^2 \cdot \|\nabla_t\|^2 \right] \\
&= \frac{L^2 \sqrt{n}}{\beta_0^2} \mathbb{E} \left[ \sum_{t=0}^{T-1} \frac{\|\nabla_t\|^2}{\sqrt{n} G_0^2 + \sum_{s=0}^t \|\nabla_s\|^2} \right] \\
&\leq \frac{L^2 \sqrt{n}}{\beta_0^2} \log \left( 1 + \mathbb{E} \left[ \sum_{t=0}^{T-1} \|\nabla_t\|^2 / G_0^2 \right] \right) \\
&\leq \frac{L^2 \sqrt{n}}{\beta_0^2} \cdot \mathcal{O} \left( \log \left( 1 + nT \cdot \left( \frac{L}{\beta_0 G_0} + \frac{\|\nabla f(x_0)\|}{G_0} \right) \right) \right)
\end{aligned}$$

where the second inequality follows by Lemma 7 and the third inequality by Lemma 2. Putting everything together we get

$$\frac{1}{T} \mathbb{E} \left[ \sum_{t=0}^{T-1} \|\nabla_t - \nabla f(x_t)\| \right] \leq \frac{Ln^{1/4}}{\beta_0 \sqrt{T}} \cdot \mathcal{O} \left( \sqrt{\log \left( 1 + nT \cdot \left( \frac{L}{\beta_0 G_0} + \frac{\|\nabla f(x_0)\|}{G_0} \right) \right)} \right)$$

■

**Lemma 4.** Let  $x_0, x_1, \dots, x_{T-1}$  the sequence of points produced by Algorithm 1 and  $\Delta_0 := f(x_0) - f^*$ . Then,

$$\mathbb{E} \left[ \sum_{t=0}^{T-1} \|\nabla_t\| \right] \leq \mathcal{O} \left( \Delta_0 \cdot \beta_0 + G_0 + \frac{L}{\beta_0} \log \left( 1 + nT \cdot \frac{L + \|\nabla f(x_0)\|}{G_0} \right) + \beta_0 \cdot \mathbb{E} \left[ \sum_{t=0}^{T-1} \gamma_t \|\nabla f(x_t) - \nabla_t\|^2 \right] \right) \cdot n^{1/4} \sqrt{T}.$$

*Proof.* Let  $\mathcal{F}_t$  denote the filtration at round  $t$  i.e. all the random choices  $\{i_0, \dots, i_t\}$  and the initial point  $x_0$ . By the smoothness of  $f$  we get that,

$$\begin{aligned} \mathbb{E}[f(x_{t+1}) | \mathcal{F}_t] &\leq \mathbb{E}\left[f(x_t) + \nabla f(x_t)^\top (x_{t+1} - x_t) + \frac{L}{2} \|x_t - x_{t+1}\|^2 | \mathcal{F}_t\right] \\ &= \mathbb{E}\left[f(x_t) - \gamma_t \nabla_t^\top \nabla f(x_t) + \frac{L}{2} \gamma_t^2 \|\nabla_t\|^2 | \mathcal{F}_t\right] \\ &\leq \mathbb{E}\left[f(x_t) + \frac{\gamma_t}{2} \|\nabla_t - \nabla f(x_t)\|^2 - \frac{\gamma_t}{2} (1 - L\gamma_t) \|\nabla_t\|^2 | \mathcal{F}_t\right] \end{aligned}$$

Thus,

$$\mathbb{E}[\gamma_t \cdot \|\nabla_t\|^2] \leq 2\mathbb{E}[f(x_t) - f(x_{t+1})] + \mathbb{E}[L\gamma_t^2 \cdot \|\nabla_t\|^2] + \beta_0 \cdot \mathbb{E}[\gamma_t \cdot \|\nabla f(x_t) - \nabla_t\|^2].$$

and by summing from  $t = 0$  to  $T - 1$  we get,

$$\sum_{t=0}^{T-1} \mathbb{E}[\gamma_t \cdot \|\nabla_t\|^2] \leq 2\Delta_0 + \mathbb{E}\left[\sum_{t=0}^{T-1} L\gamma_t^2 \cdot \|\nabla_t\|^2\right] + \mathbb{E}\left[\sum_{t=0}^{T-1} \gamma_t \cdot \|\nabla f(x_t) - \nabla_t\|^2\right]$$

Using the fact that  $\gamma_t := n^{-1/4} \beta_0^{-1} \left(n^{1/2} G_0^2 + \sum_{s=0}^t \|\nabla_s\|^2\right)^{-1/2}$  on the second summation term,

$$\begin{aligned} \mathbb{E}\left[\sum_{t=0}^{T-1} \gamma_t \cdot \|\nabla_t\|^2\right] &\leq 2\Delta_0 + \mathbb{E}\left[\sum_{t=0}^{T-1} L\gamma_t^2 \cdot \|\nabla_t\|^2\right] + \mathbb{E}\left[\sum_{t=0}^{T-1} \gamma_t \cdot \|\nabla f(x_t) - \nabla_t\|^2\right] \\ &\leq 2\Delta_0 + \frac{L}{\beta_0^2} \cdot \mathbb{E}\left[\sum_{t=0}^{T-1} \frac{\|\nabla_t\|^2}{\sqrt{n}G_0^2 + \sum_{s=0}^t \|\nabla_s\|^2}\right] \\ &\quad + \mathbb{E}\left[\sum_{t=0}^{T-1} \gamma_t \cdot \|\nabla f(x_t) - \nabla_t\|^2\right] \\ &\leq 2\Delta_0 + \frac{L}{\beta_0^2} \cdot \mathcal{O}\left(\log\left(1 + nT \cdot \left(\frac{L}{\beta_0 G_0} + \frac{\|\nabla f(x_0)\|}{G_0}\right)\right)\right) + \mathbb{E}\left[\sum_{t=0}^{T-1} \gamma_t \cdot \|\nabla f(x_t) - \nabla_t\|^2\right] \end{aligned}$$

Using again the definition of the step-size  $\gamma_t := n^{-1/4} \beta_0^{-1} \left(n^{1/2} G_0^2 + \sum_{s=0}^t \|\nabla_s\|^2\right)^{-1/2}$  we lower bound the right-hand side as follows,

$$\begin{aligned} \mathbb{E}\left[\sum_{t=0}^{T-1} \gamma_t \cdot \|\nabla_t\|^2\right] &\geq \mathbb{E}\left[\frac{\sum_{t=0}^{T-1} \|\nabla_t\|^2}{n^{1/4} \beta_0 \sqrt{n^{1/2} G_0^2 + \sum_{t=0}^{T-1} \|\nabla_t\|^2}}\right] \\ &\geq \frac{G_0}{\beta_0} \cdot \mathbb{E}\left[\frac{\sum_{t=0}^{T-1} \|\nabla_t\|^2 / \sqrt{n} G_0^2}{\sqrt{1 + \sum_{t=0}^{T-1} \|\nabla_t\|^2 / \sqrt{n} G_0^2}}\right] \\ &\geq \frac{G_0}{\beta_0} \cdot \left(\mathbb{E}\left[\sqrt{\frac{\sum_{t=0}^{T-1} \|\nabla_t\|^2 / \sqrt{n} G_0^2}{1 + \sum_{t=0}^{T-1} \|\nabla_t\|^2 / \sqrt{n} G_0^2}}\right] - 1\right) \\ &\geq \frac{1}{\beta_0 n^{1/4} \sqrt{T}} \mathbb{E}\left[\sum_{t=0}^{T-1} \|\nabla_t\|\right] - \frac{G_0}{\beta_0} \end{aligned}$$

By putting everything together we get,

$$\begin{aligned} \mathbb{E}\left[\sum_{t=0}^{T-1} \|\nabla_t\|\right] &\leq \mathcal{O}\left(\Delta_0 \cdot \beta_0 + G_0 + \frac{L}{\beta_0} \log\left(1 + nT \cdot \left(\frac{L}{\beta_0 G_0} + \frac{\|\nabla f(x_0)\|}{G_0}\right)\right)\right) \\ &\quad + \mathcal{O}\left(\beta_0 \cdot \mathbb{E}\left[\sum_{t=0}^{T-1} \gamma_t \|\nabla f(x_t) - \nabla_t\|^2\right]\right) \cdot n^{1/4} \sqrt{T}. \end{aligned}$$

■

**Lemma 5.** Let  $x_0, x_1, \dots, x_{T-1}$  the sequence of points produced by Algorithm 1. Then,

$$\mathbb{E} \left[ \sum_{t=0}^{T-1} \gamma_t \cdot \|\nabla_t - \nabla f(x_t)\|^2 \right] \leq L^2 n \cdot \mathbb{E} \left[ \sum_{t=0}^{T-1} \gamma_t^3 \cdot \|\nabla_t\|^2 \right]$$

*Proof.* Let  $\mathcal{F}_t$  denotes the filtration at round  $t$  i.e. all the random choices  $\{i_0, \dots, i_t\}$  and the initial point  $x_0$ . At first notice that by the definition of  $\gamma_t$  in Step 9 of Algorithm 1,  $\gamma_t \leq \gamma_{t-1}$ , which we have to do to circumvent non-measurability issues, and thus

$$\mathbb{E} [\gamma_t \|\nabla_t - \nabla f(x_t)\|^2 \mid \mathcal{F}_{t-1}] \leq \mathbb{E} [\gamma_{t-1} \cdot \|\nabla_t - \nabla f(x_t)\|^2 \mid \mathcal{F}_{t-1}]$$

Up next we derive a bound on  $\mathbb{E} [\gamma_{t-1} \cdot \|\nabla_t - \nabla f(x_t)\|^2 \mid \mathcal{F}_{t-1}]$  using similar arguments with the ones used in Lemma 3. Notice that  $\gamma_{t-1}$  is  $\mathcal{F}_{t-1}$ -measurable, hence we can treat in independent of the conditional expectation.

$$\begin{aligned} & \mathbb{E} [\gamma_{t-1} \|\nabla_t - \nabla f(x_t)\|^2 \mid \mathcal{F}_{t-1}] \\ &= \gamma_{t-1} \mathbb{E} [\|\nabla f_{i_t}(x_t) - \nabla f_{i_t}(x_{t-1}) - \nabla f(x_t) + \nabla f(x_{t-1}) + (\nabla_{t-1} - \nabla f(x_{t-1}))\|^2 \mid \mathcal{F}_{t-1}] \\ &= \gamma_{t-1} \mathbb{E} [\|\nabla f_{i_t}(x_t) - \nabla f_{i_t}(x_{t-1}) - \nabla f(x_t) + \nabla f(x_{t-1})\|^2 \mid \mathcal{F}_{t-1}] \\ &+ \underbrace{\gamma_{t-1} \mathbb{E} [(\nabla f_{i_t}(x_t) - \nabla f_{i_t}(x_{t-1}) - \nabla f(x_t) + \nabla f(x_{t-1}))^\top (\nabla_{t-1} - \nabla f(x_{t-1})) \mid \mathcal{F}_{t-1}]}_0 \\ &+ \gamma_{t-1} \mathbb{E} [\|\nabla_{t-1} - \nabla f(x_{t-1})\|^2 \mid \mathcal{F}_{t-1}] \\ &= \gamma_{t-1} \mathbb{E} [\|\nabla f_{i_t}(x_t) - \nabla f_{i_t}(x_{t-1})\|^2 \mid \mathcal{F}_{t-1}] + \gamma_{t-1} \mathbb{E} [\|\nabla_{t-1} - \nabla f(x_{t-1})\|^2 \mid \mathcal{F}_{t-1}] \\ &\leq L^2 \gamma_{t-1} \mathbb{E} [\|x_t - x_{t-1}\|^2 \mid \mathcal{F}_{t-1}] + \gamma_{t-1} \mathbb{E} [\|\nabla_{t-1} - \nabla f(x_{t-1})\|^2 \mid \mathcal{F}_{t-1}] \\ &= L^2 \gamma_{t-1}^3 \mathbb{E} [\|\nabla_{t-1}\|^2 \mid \mathcal{F}_{t-1}] + \gamma_{t-1} \mathbb{E} [\|\nabla_{t-1} - \nabla f(x_{t-1})\|^2 \mid \mathcal{F}_{t-1}] \end{aligned}$$

Taking full expectation over all randomness and by the law of total expctation, we get that,

$$\mathbb{E} [\gamma_t \|\nabla_t - \nabla f(x_t)\|^2] \leq L^2 \mathbb{E} [\gamma_{t-1}^3 \|\nabla_{t-1}\|^2] + \mathbb{E} [\gamma_{t-1} \|\nabla_{t-1} - \nabla f(x_{t-1})\|^2]$$

Due to the fact that  $\mathbb{E} [\|\nabla_t - \nabla f(x_t)\|] = 0$  for  $t \bmod n = 0$  we get that

$$\mathbb{E} [\gamma_t \cdot \|\nabla_t - \nabla f(x_t)\|^2] \leq L^2 \mathbb{E} \left[ \sum_{s=t-t \bmod n}^{t-1} \gamma_s^3 \|\nabla_s\|^2 \right]$$

and thus

$$\mathbb{E} \left[ \sum_{t=0}^{T-1} \gamma_t \cdot \|\nabla_t - \nabla f(x_t)\|^2 \right] \leq L^2 n \cdot \mathbb{E} \left[ \sum_{t=0}^{T-1} \gamma_t^3 \|\nabla_t\|^2 \right]$$

■

**Theorem 1.** Let  $x_0, x_1, \dots, x_{T-1}$  be the sequence of points produced by Algorithm 1 in case  $f(\cdot)$  is  $L$ -smooth. Let us also define  $\Delta_0 := f(x_0) - f^*$ . Then,

$$\frac{1}{T} \sum_{t=0}^{T-1} \mathbb{E} [\|\nabla f(x_t)\|] \leq O \left( n^{1/4} \cdot \frac{\Delta_0 \cdot \beta_0 + G_0 + L/\beta_0 + L^2/\beta_0^2 G_0}{\sqrt{T}} \cdot \log \left( 1 + nT \cdot \left( \frac{L}{\beta_0 G_0} + \frac{\|\nabla f(x_0)\|}{G_0} \right) \right) \right)$$

Overall, Algorithm 1 with  $\beta_0 := 1$  and  $G_0 := 1$  needs at most  $\tilde{O} \left( n + \sqrt{n} \cdot \frac{\Delta_0^2 + L^4}{\epsilon^2} \right)$  oracle calls to reach an  $\epsilon$ -stationary point.

*Proof of Theorem 1.* By the triangle inequality we get that

$$\mathbb{E} \left[ \sum_{t=0}^{T-1} \|\nabla f(x_t)\| \right] \leq \mathbb{E} \left[ \sum_{t=0}^{T-1} \|\nabla_t\| \right] + \mathbb{E} \left[ \sum_{t=0}^{T-1} \|\nabla f(x_t) - \nabla_t\| \right]$$

Using the bounds obtained in Lemma 3 and Lemma 4 we get that,

$$\begin{aligned} \mathbb{E} \left[ \sum_{t=0}^{T-1} \|\nabla f(x_t)\| \right] &\leq \tilde{O} \left( \Delta_0 \cdot \beta_0 + G_0 + \frac{L}{\beta_0} \right) n^{1/4} \sqrt{T} \\ &+ \beta_0 \cdot \mathbb{E} \left[ \sum_{t=0}^{T-1} \gamma_t \|\nabla f(x_t) - \nabla_t\|^2 \right] n^{1/4} \sqrt{T} \end{aligned}$$

Then by Lemma 5 we get that,

$$\begin{aligned} \mathbb{E} \left[ \sum_{t=0}^{T-1} \|\nabla f(x_t)\| \right] &\leq \tilde{O} \left( \Delta_0 \cdot \beta_0 + G_0 + \frac{L}{\beta_0} \right) n^{1/4} \sqrt{T} \\ &+ \underbrace{\beta_0 \cdot n^{5/4} \sqrt{T} L^2 \cdot \mathbb{E} \left[ \sum_{t=0}^{T-1} \gamma_t^3 \|\nabla_t\|^2 \right]}_{(A)} \end{aligned}$$

Substituting the selection of  $\gamma_t$  in term (A) we get,

$$\begin{aligned} \beta_0 \sqrt{T} L^2 \cdot \mathbb{E} \left[ \sum_{t=0}^{T-1} n^{5/4} \gamma_t^3 \|\nabla_t\|^2 \right] &= \frac{\sqrt{T} L^2}{\beta_0^2} \cdot \mathbb{E} \left[ \sum_{t=0}^{T-1} \frac{n^{5/4}}{n^{3/4} \sqrt{n^{1/2} G_0^2 + \sum_{s=0}^t \|\nabla_s\|^2}} \cdot \frac{\|\nabla_t\|^2}{n^{1/2} G_0^2 + \sum_{s=0}^t \|\nabla_s\|^2} \right] \\ &\leq \frac{\sqrt{T} L^2}{\beta_0^2 G_0} \cdot \mathbb{E} \left[ \sum_{t=0}^{T-1} \frac{n^{5/4}}{n^{3/4} \sqrt{n^{1/2}}} \cdot \frac{\|\nabla_t\|^2 / G_0^2}{n^{1/2} + \sum_{s=0}^t \|\nabla_s\|^2 / G_0^2} \right] \\ &\leq \frac{\sqrt{T} L^2}{\beta_0^2 G_0} \cdot n^{1/4} \cdot \mathbb{E} \left[ \sum_{t=0}^{T-1} \frac{\|\nabla_t\|^2 / G_0^2}{1 + \sum_{s=0}^t \|\nabla_s\|^2 / G_0^2} \right] \\ &\leq \frac{\sqrt{T} L^2}{\beta_0^2 G_0} \cdot n^{1/4} \cdot \mathcal{O} \left( \log \left( 1 + nT \cdot \left( \frac{L}{\beta_0 G_0} + \frac{\|\nabla f(x_0)\|}{G_0} \right) \right) \right) \end{aligned}$$

where the forth inequality follows by Lemma 7 and the last by Lemma 2. Theorem 1 then follows by dividing both sides with  $T$ .  $\blacksquare$
